# Supplementary material
Source: Research Square preprint supplement (doi:10.21203/rs.3.rs-9561256/v1)
Supplement: Supplementary file 1 [file 654f0cfdbb759fc10d8b6150.docx]

# Appendix: Questionnaire

## Part A: Socio-Demographic Information

1. **Age**
   - 20–30 years
   - 31–40 years
   - 41–50 years
   - Above 50 years

## Gender

- - Male
  - Female
  - Prefer not to say

## Highest Educational Qualification

- - Diploma in Nursing
  - Bachelor’s Degree in Nursing
  - Postgraduate in Nursing
  - Other (specify):

## Years of Clinical Experience

- - Less than 1 year
  - 1–5 years
  - 6–10 years
  - More than 10 years

## Current Work Unit/Department

- - Emergency
  - CCU
  - Cardiology
  - Others:

## Have you received formal CPR training?

- - Yes
  - No

## When was your last CPR training?

- - Less than 6 months ago
  - 6 months–1 year ago
  - More than 1 year ago
  - Never attended CPR training

## Part B: Nurses’ Knowledge Regarding Cardiopulmonary Resuscitation

1. What is the correct chest compression rate for adults?
   - 80–100/min
   - 100–120/min
   - 120–140/min
   - 60–80/min
2. What is the recommended compression depth in adult CPR?
   - 1 inch
   - 2 inches
   - At least 2 inches (5 cm)
   - More than 3 inches
3. What should be the position of hands during adult chest compressions?
   - One hand over the sternum
   - Two fingers below the nipple line
   - Heel of one hand on the lower sternum
   - Heel of one hand over the center of the chest with the other hand on top
4. Which artery is used to check the pulse in an unconscious adult?
   - Brachial
   - Femoral
   - Carotid
   - Radial
5. What should you do if there is no pulse and the victim is not breathing?
   - Start rescue breathing only
   - Wait for a defibrillator
   - Start chest compressions immediately
   - Check for injuries first
6. What is the purpose of allowing full chest recoil between compressions?
   - It gives the rescuer a break
   - It allows the heart to refill with blood
   - It slows down the CPR process
   - It improves oxygen saturation
7. Which of the following is a sign of effective ventilation during rescue breathing?
   - Chest rise and fall
   - Gurgling sounds
   - Air escaping through the nose
   - No response
8. What should be avoided during rescue breathing?
   - Proper head tilt
   - Over-ventilation
   - Use of bag-valve mask
   - Mouth-to-mouth seal
9. If a foreign object is visible in the airway, what should you do?
   - Begin compressions
   - Attempt to remove it carefully
   - Start rescue breathing
   - Ignore it and continue CPR
10. What is the best surface for performing CPR?
    - A soft mattress
    - A firm, hard surface
    - A recliner chair
    - Any flat area
11. What is the most reliable indicator of effective CPR?
    - Loud chest sounds
    - Chest wall movement
    - Return of spontaneous circulation (ROSC)
    - Increased blood pressure

## Yes/No Questions

1. Should CPR be initiated before informing the doctor in emergencies? □ Yes □ No
2. Should 2-rescuer team switch roles after every 5 cycles of CPR? □ Yes □ No
3. Do rescue breaths make the chest visibly rise? □ Yes □ No
4. Is CPR recommended if the victim has a DNR (Do Not Resuscitate) order? □ Yes □

No

1. Is the compression to ventilation ratio for single rescuer 30:2? □ Yes □ No
2. Should CPR be done on every person in cardiac emergency? □ Yes □ No
3. Is proper hand placement essential for effective compressions? □ Yes □ No
4. Can CPR be stopped after the first AED shock is delivered? □ Yes □ No
5. Should chest compressions be fast and shallow to avoid injury? □ Yes □ No
6. Is the recovery position used for unconscious but breathing individuals? □ Yes □ No
7. Is the goal of CPR to restore spontaneous circulation and breathing? □ Yes □ No
8. Do Nurses ethically responsible for initiating CPR in hospital settings when indicated?

□ Yes □ No

1. Should an AED be used as soon as it becomes available? □ Yes □ No
2. Should chest compressions be interrupted as often as needed to check for ROSC? □ Yes
   - No
